# Supplementary material for: Meta-analysis of the effect of perioperative intravenous lidocaine on return of gastrointestinal function after colorectal surgery
Source: PubMed Central journal article supplement (PMC6394718; doi:10.1007/s10151-019-1927-1), 2019-02-05
Supplement: 10151_2019_1927_MOESM2_ESM.pdf [file 10151_2019_1927_MOESM2_ESM.pdf]

# Sensitivity Analysis: Time to BO excluding each study

*nventham*

*Fri Nov 30 09:56:06 2018*

## Contents

|                                                 |          |
|-------------------------------------------------|----------|
| <b>S1 Time until Bowels Excluding Elhafz</b>    | <b>2</b> |
| <b>S2 Time until Bowels Excluding Kaba</b>      | <b>3</b> |
| <b>S3 Time until Bowels Excluding Kim</b>       | <b>4</b> |
| <b>S4 Time until Bowels Excluding Tikuisis</b>  | <b>5</b> |
| <b>S5 Time until Bowels Excluding Harvey</b>    | <b>6</b> |
| <b>S6 Time until Bowels Excluding Herroeder</b> | <b>7</b> |
| <b>S7 Time until Bowels Excluding Ho</b>        | <b>8</b> |

# S1 Time until Bowels Excluding Elhafz

## Time until resumption of Bowels

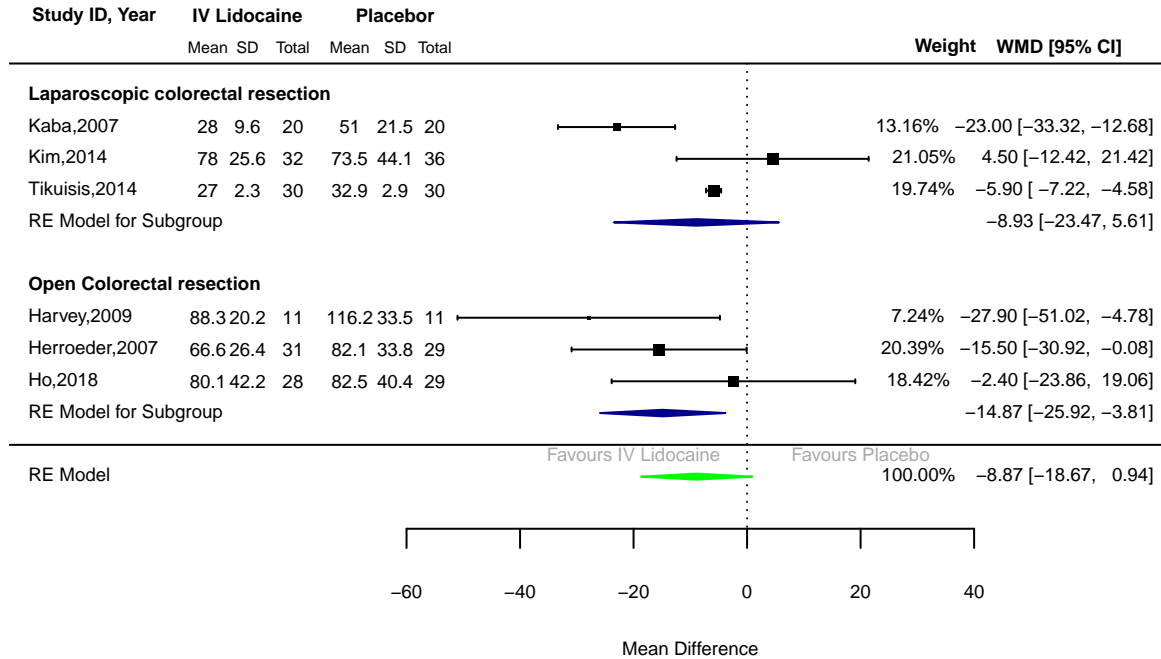

- **Bowels: Overall Results**

- Heterogeneity I2 = 70.79 %
- WMD = -8.87
- Lower CI = -18.67
- Upper CI = 0.94
- pValue = 0.08
- Funnel Plot Asymmetry pValue = 0.96

- *Bowels: Open Surgery: IV Lidocaine Versus Placebo*

- Heterogeneity I2 = 0.66 %
- WMD = -14.87
- Lower CI = -25.92
- Upper CI = -3.81
- pValue = 0.008

- *Bowels: Laparoscopic Surgery: IV Lidocaine Versus Placebo*

- Heterogeneity I2 = 86.87 %
- WMD = -8.93
- Lower CI = -23.47
- Upper CI = 5.61
- pValue = 0.23

## S2 Time until Bowels Excluding Kaba

### Time until resumption of Bowels

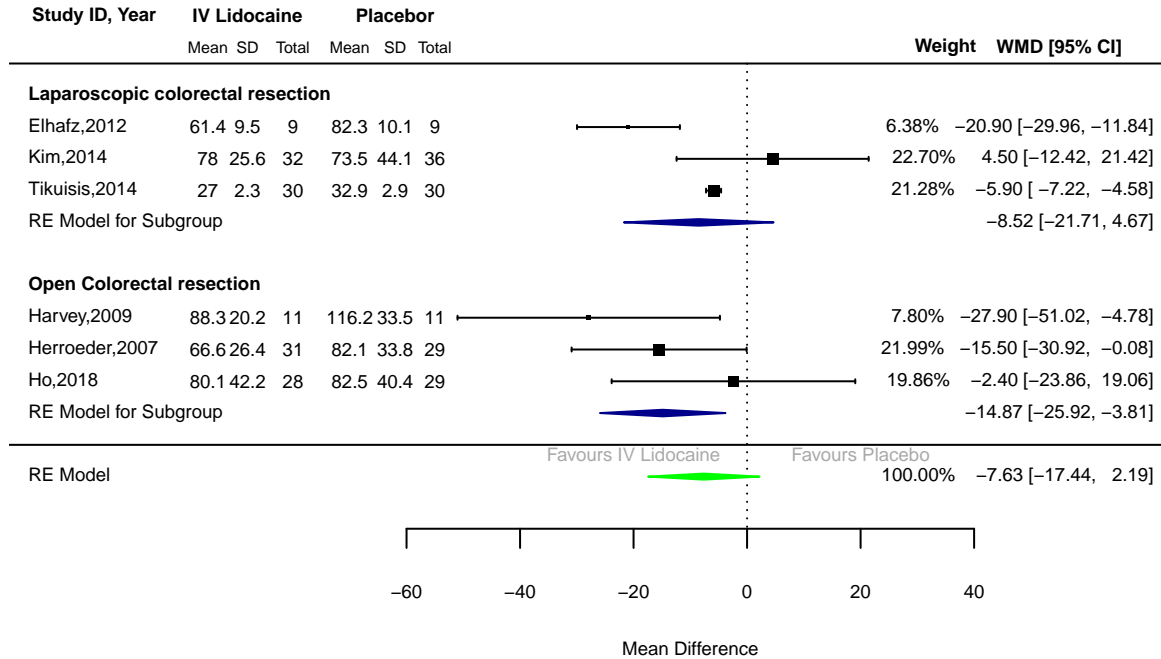

- **Bowels: Overall Results**

- Heterogeneity I<sup>2</sup> = 69.79 %
- WMD = -7.63
- Lower CI = -17.44
- Upper CI = 2.19
- pValue = 0.13
- Funnel Plot Asymmetry pValue = 0.97

- *Bowels: Open Surgery: IV Lidocaine Versus Placebo*

- Heterogeneity I<sup>2</sup> = 0.66 %
- WMD = -14.87
- Lower CI = -25.92
- Upper CI = -3.81
- pValue = 0.008

- *Bowels: Laparoscopic Surgery: IV Lidocaine Versus Placebo*

- Heterogeneity I<sup>2</sup> = 86.63 %
- WMD = -8.52
- Lower CI = -21.71
- Upper CI = 4.67
- pValue = 0.21

# S3 Time until Bowels Excluding Kim

## Time until resumption of Bowels

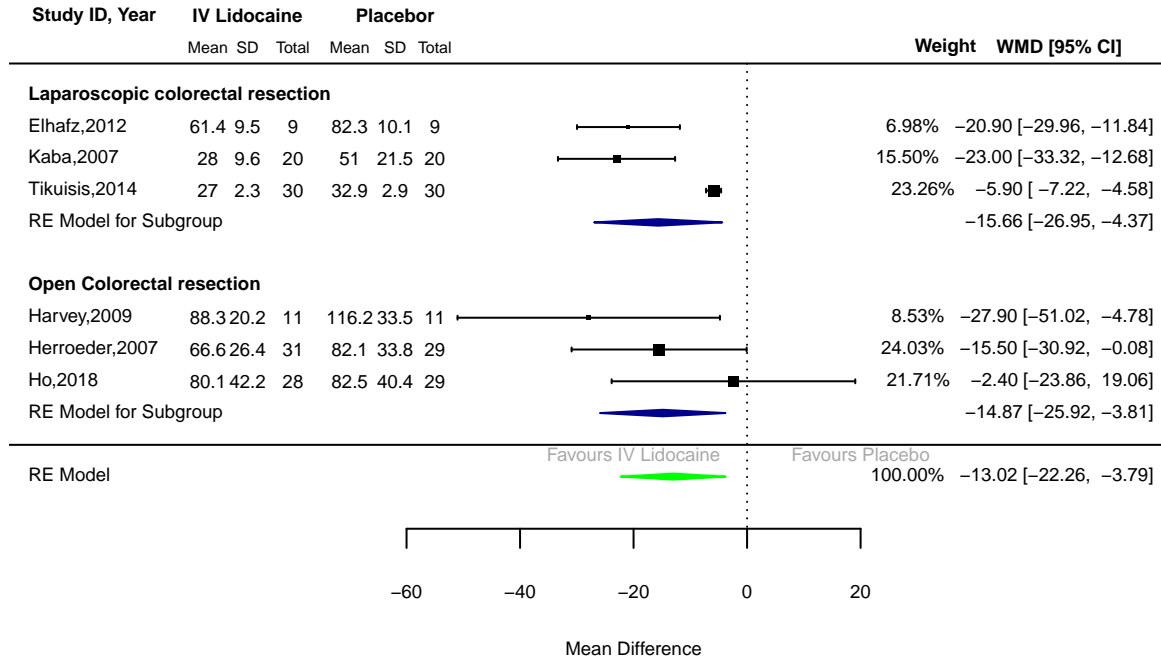

- **Bowels: Overall Results**

- Heterogeneity I2 = 71.76 %
- WMD = -13.02
- Lower CI = -22.26
- Upper CI = -3.79
- pValue = 0.01
- Funnel Plot Asymmetry pValue = 0.82

- *Bowels: Open Surgery: IV Lidocaine Versus Placebo*

- Heterogeneity I2 = 0.66 %
- WMD = -14.87
- Lower CI = -25.92
- Upper CI = -3.81
- pValue = 0.008

- *Bowels: Laparoscopic Surgery: IV Lidocaine Versus Placebo*

- Heterogeneity I2 = 87.19 %
- WMD = -15.66
- Lower CI = -26.95
- Upper CI = -4.37
- pValue = 0.01

# S4 Time until Bowels Excluding Tikuisis

## Time until resumption of Bowels

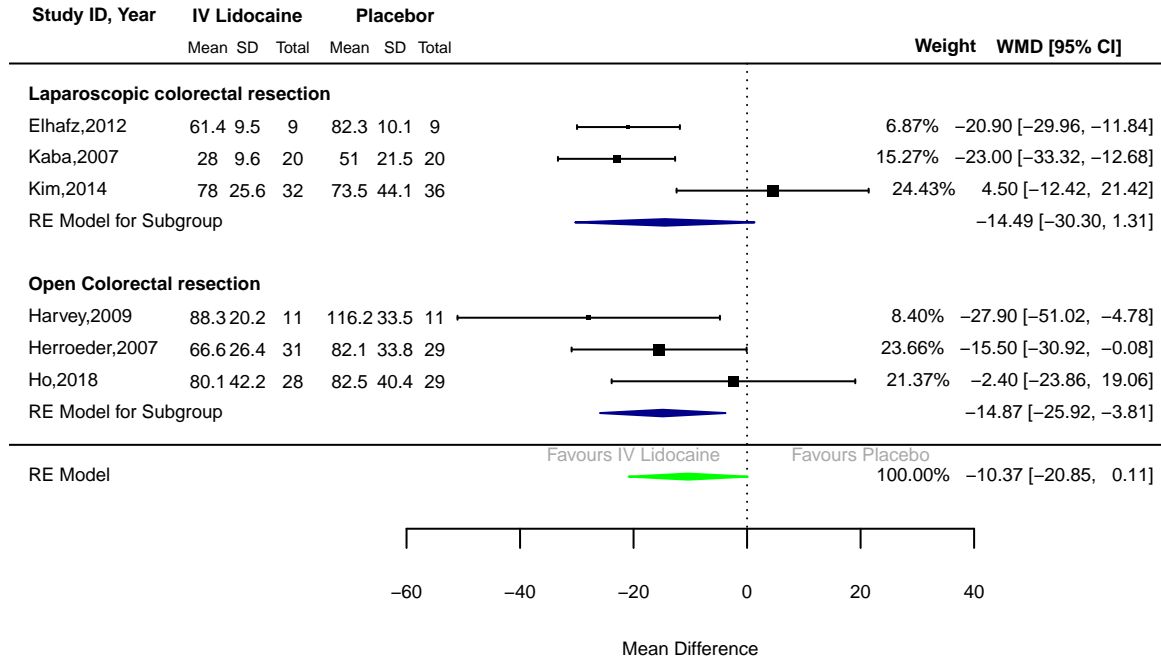

- **Bowels: Overall Results**

- Heterogeneity I2 = 56.91 %
- WMD = -10.37
- Lower CI = -20.85
- Upper CI = 0.11
- pValue = 0.05
- Funnel Plot Asymmetry pValue = 0.32

- *Bowels: Open Surgery: IV Lidocaine Versus Placebo*

- Heterogeneity I2 = 0.66 %
- WMD = -14.87
- Lower CI = -25.92
- Upper CI = -3.81
- pValue = 0.008

- *Bowels: Laparoscopic Surgery: IV Lidocaine Versus Placebo*

- Heterogeneity I2 = 81.99 %
- WMD = -14.49
- Lower CI = -30.3
- Upper CI = 1.31
- pValue = 0.07

# S5 Time until Bowels Excluding Harvey

## Time until resumption of Bowels

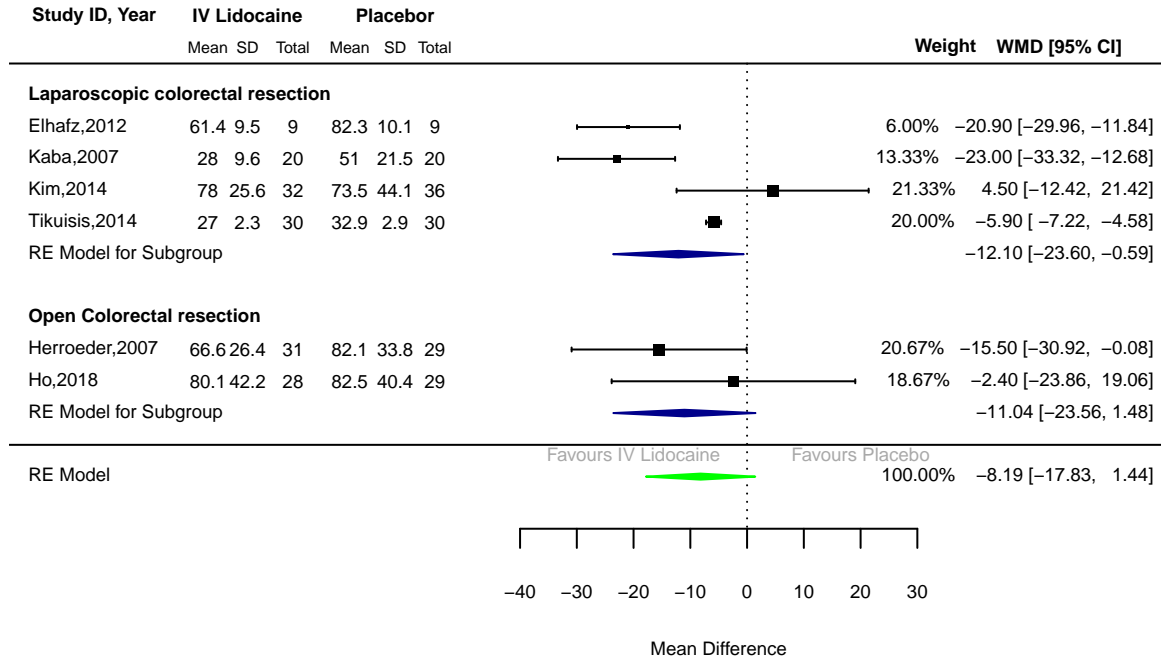

- **Bowels: Overall Results**

- Heterogeneity I<sup>2</sup> = 77.19 %
- WMD = -8.19
- Lower CI = -17.83
- Upper CI = 1.44
- pValue = 0.1
- Funnel Plot Asymmetry pValue = 0.6

- *Bowels: Open Surgery: IV Lidocaine Versus Placebo*

- Heterogeneity I<sup>2</sup> = 0 %
- WMD = -11.04
- Lower CI = -23.56
- Upper CI = 1.48
- pValue = 0.084

- *Bowels: Laparoscopic Surgery: IV Lidocaine Versus Placebo*

- Heterogeneity I<sup>2</sup> = 87.42 %
- WMD = -12.1
- Lower CI = -23.6
- Upper CI = -0.59
- pValue = 0.04

# S6 Time until Bowels Excluding Herroeder

## Time until resumption of Bowels

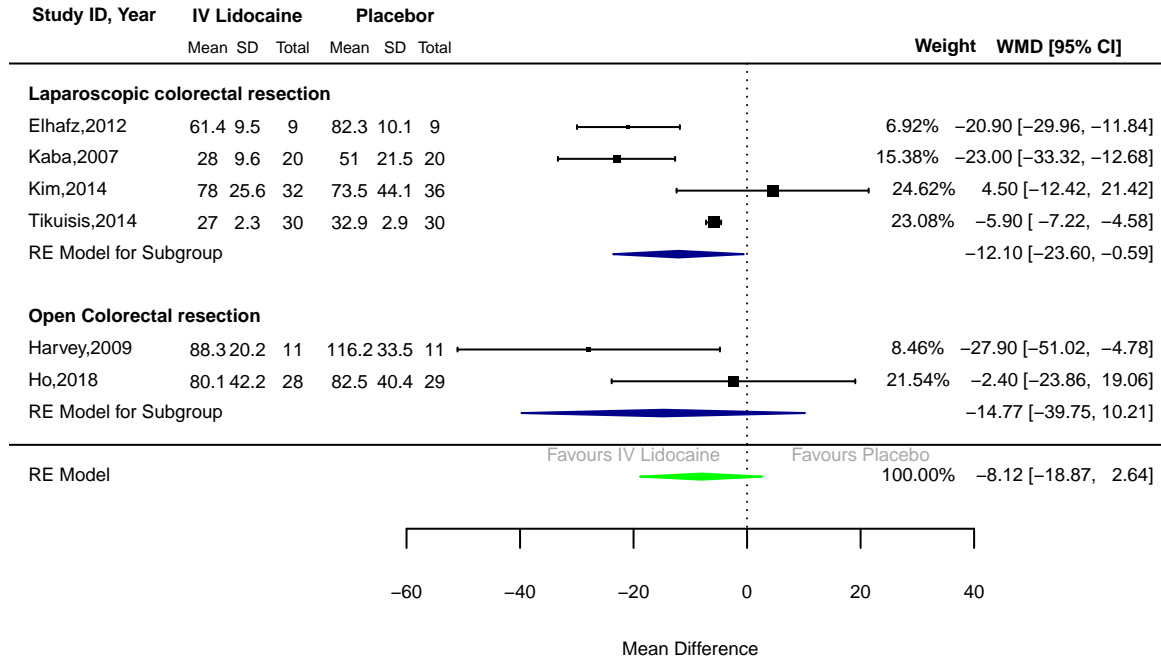

- **Bowels: Overall Results**

- Heterogeneity I2 = 80.15 %
- WMD = -8.12
- Lower CI = -18.87
- Upper CI = 2.64
- pValue = 0.14
- Funnel Plot Asymmetry pValue = 0.84

- *Bowels: Open Surgery: IV Lidocaine Versus Placebo*

- Heterogeneity I2 = 60.17 %
- WMD = -14.77
- Lower CI = -39.75
- Upper CI = 10.21
- pValue = 0.246

- *Bowels: Laparoscopic Surgery: IV Lidocaine Versus Placebo*

- Heterogeneity I2 = 87.42 %
- WMD = -12.1
- Lower CI = -23.6
- Upper CI = -0.59
- pValue = 0.04

# S7 Time until Bowels Excluding Ho

## Time until resumption of Bowels

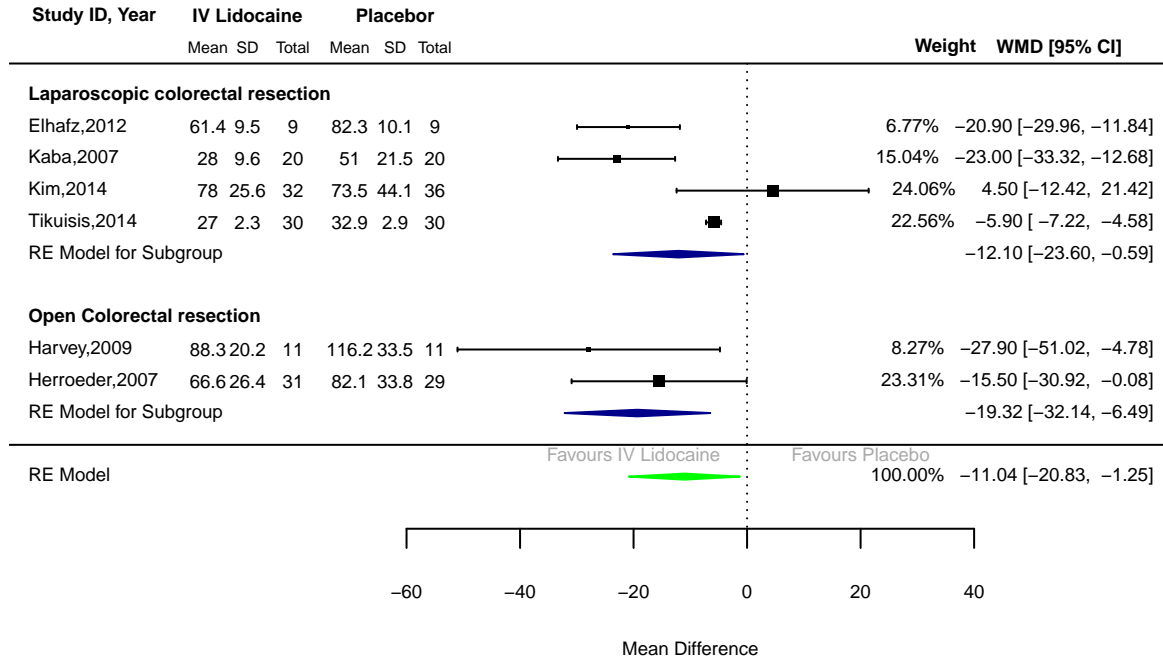

- **Bowels: Overall Results**

- Heterogeneity I<sup>2</sup> = 78.54 %
- WMD = -11.04
- Lower CI = -20.83
- Upper CI = -1.25
- pValue = 0.03
- Funnel Plot Asymmetry pValue = 0.81

- *Bowels: Open Surgery: IV Lidocaine Versus Placebo*

- Heterogeneity I<sup>2</sup> = 0 %
- WMD = -19.32
- Lower CI = -32.14
- Upper CI = -6.49
- pValue = 0.003

- *Bowels: Laparoscopic Surgery: IV Lidocaine Versus Placebo*

- Heterogeneity I<sup>2</sup> = 87.42 %
- WMD = -12.1
- Lower CI = -23.6
- Upper CI = -0.59
- pValue = 0.04



“
